# Supplementary material for: Development of a microfluidic platform integrating high-resolution microstructured biomaterials to study cell–material interactions
Source: Royal Society of Chemistry journal article supplement (doi:10.1039/c7lc00802c), 2017-01-01
Supplement: c7lc00802c1.pdf [file c7lc00802c1.pdf]

**Development of a microfluidic platform integrating high-resolution microstructured biomaterials to study cell-material interactions**

Barata, et al.

**Supplementary Information**

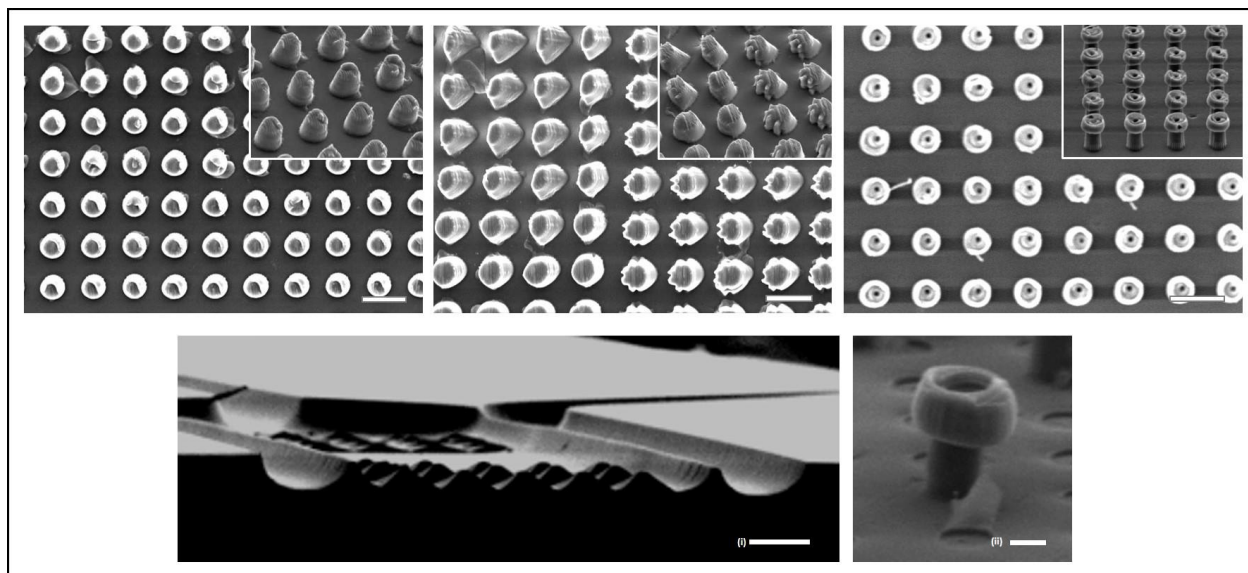

**Supplementary Fig. S1.** Scanning electron microscopy images of other features inside the microfluidic device: (A) circular pillar array, (B) asymmetric pillar array, (C) mushroom-like array. (C) Microfluidic substrate after hot embossing, prior to bonding to PDMS lid. (D) Detail of isolated mushroom after embossing of PLA film. Scale bar = 100 µm / scalebar <sup>(i)</sup> = 100 µm / scalebar <sup>(ii)</sup> = 2 µm.
